# Supplementary material
Source: publisher figshare collection journal article supplement (https://karger.figshare.com/ndownloader/files/27775260)
Supplement: Supplementary file 1 [file 27775260]

**Supplementary Table 3: Inter-tumour comparison of quantitative MR parameters between NFG/macroprolactinomas and different somatotropinoma granulation subtypes**

GH = somatotropinoma; NFG= non-functioning gonadotropinoma; PRL=macroprolactinoma; SI= signal intensity

P value calculated using one-way ANOVA or the Kruskal-Wallis test in the case of non-parametric data (e.g. tumour size). Post hoc analysis of pairwise comparisons was performed using the Bonferroni method.

| **Tumour MR parameter**  Within group mean (S.D) |  | **NFG vs**  **Sparsely GH (n=7)** | **PRL vs**  **Sparsely GH (n=7)** | **NFG vs Densely/intermediate GH** **(n=31)** | **PRL vs**  **Densely/intermediate GH** **(n=31)** |
| --- | --- | --- | --- | --- | --- |
|  | **P value** | **P value** | **P value** | **P value** |
| **Median Tumour size cm3**  **(IQR)** |  | 0.99 | 0.11 | 0.05 | <0.001 |
| **Tumour/WM**  **T2W SI ratio** |  | 0.13 | 0.85 | <0.001 | <0.001 |
| **Tumour/WM**  **T1W SI ratio** |  | 0.69 | 0.99 | 0.29 | 0.05 |
| **Tumour/CSF**  **T2W SI ratio** |  | 0.25 | 0.63 | <0.001 | <0.001 |
| **Tumour/CSF**  **T1W SI ratio** |  | 0.87 | 0.15 | <0.001 | <0.001 |
| **Tumour T2/T1**  **SIRatio - WM** |  | 0.60 | 0.74 | <0.001 | <0.001 |
| **Tumour T2/T1**  **SIRatio - CSF** |  | 0.63 | 0.22 | <0.001 | <0.001 |
